# Supplementary material
Source: Springer Nature journal article supplement (https://www.springermedizin.de/resource/supplementary/12885_2013_4534_MOESM3_ESM.pdf/9466644)
Supplement: MOESM3 [file 9466644]

Table S3. Gene expression profiles of various MMPs in NPC

| <b>Genes</b> | <b>Probes</b> | <b>Fold change<br/>NPC/normal</b> |
|--------------|---------------|-----------------------------------|
| MMP1*        | 204475_at     | 9.464                             |
| MMP2         | 201069_at     | 1.056                             |
| MMP3*        | 205828_at     | 14.200                            |
| MMP7         | 204259_at     | 0.904                             |
| MMP8         | 207329_at     | ND                                |
| MMP9*        | 203936_s_at   | 40.460                            |
| MMP10        | 205680_at     | 0.282                             |
| MMP11*       | 203878_s_at   | 4.708                             |
| MMP12*       | 204580_at     | 27.770                            |
| MMP13*       | 205959_at     | 4.293                             |
| MMP14*       | 160020_at     | 1.806                             |
| MMP15        | 243883_at     | ND                                |
| MMP16        | 207012_at     | 0.351                             |
| MMP17        | 206234_s_at   | ND                                |
| MMP19*       | 204575_s_at   | 2.625                             |
| MMP20        | 207599_at     | ND                                |
| MMP21*       | 1552592_at    | 3.123                             |
| MMP23B       | 207118_s_at   | ND                                |
| MMP24        | 208387_s_at   | 1.099                             |
| MMP25*       | 207890_s_at   | 1.755                             |
| MMP26        | 220541_at     | 0.228                             |
| MMP27        | 220783_at     | ND                                |
| MMP28*       | 219909_at     | 2.911                             |

The relative fold-change of mRNA expression between NPC and adjacent normal tissues was determined by Affymetrix microchip analysis. Affymetrix microarrays analysis has been previously described (Chen et al., 2010). Abbreviations and symbols: ND, not detected; \*, 1.5-fold increase in NPC compared with normal tissues.
